# Supplementary material for: Impact of Environmental Microbes on the Composition of the Gut Microbiota of Adult BALB/c Mice
Source: PLoS One. 2016 Aug 12;11(8):e0160568. doi: 10.1371/journal.pone.0160568 (PMC4982623; doi:10.1371/journal.pone.0160568)
Supplement: S1 Table — (XLSX) [file pone.0160568.s004.xlsx]

## Sheet: Sheet1
S1 Table. Miseq data summary with the number of total sequence reads and qualified sequence reads.
Sample	Mouse gender	total Sequences	Qualified sequences
C1	female	68354	49128
C2	female	85537	72591
C3	female	68547	46858
C4	female	69384	51477
C5	female	82850	64095
C6	male	86918	68969
C7	male	70914	61961
C8	male	63815	53134
P1	female	83329	81578
P2	female	82173	78419
P3	female	83917	60794
P4	female	83336	81817
P5	female	63638	55335
P6	male	66285	62193
P7	male	77233	68010
P8	male	82934	76724
IM1	female	62928	49657
IM2	female	63135	42376
IM3	female	85412	65817
IM4	female	70009	54341
IM5	male	88492	70873
IM6	male	89589	78515
IM7	male	87897	62241
IM8	male	89160	72815
Mouse groups: C (control), P (probiotics), and IM (Intestinal microbes).
