# Supplementary material for: Impact of Environmental Microbes on the Composition of the Gut Microbiota of Adult BALB/c Mice
Source: PLoS One. 2016 Aug 12;11(8):e0160568. doi: 10.1371/journal.pone.0160568 (PMC4982623; doi:10.1371/journal.pone.0160568)
Supplement: S2 Table — (XLSX) [file pone.0160568.s005.xlsx]

## Sheet: Sheet1
S2 Table. Microbial diversity indices with OTUs obtained by UCLUST (97% similarity).
(A) Number of OTUs
(I)group (J)group	Mean Difference (I-J)	Std. Error	Sig.(P-values)	95% Confidence Interval
				Lower Bound	Upper Bound
Con. IM	-109.12500*	40.751	0.01266	-192.89	-25.3602
IM Pro.	138.37500**	40.751	0.0022	54.6102	222.14
Con. Pro.	29.25	40.751	0.47929	-54.5148	113.015
(B) Chao estimator
(I)group (J)group	Mean Difference (I-J)	Std. Error	Sig.(P-values)	95% Confidence Interval
				Lower Bound	Upper Bound
Con. IM	-420.2500**	113.236	0.00098	-653.01	-187.49
IM Pro.	479.87500**	113.236	0.00025	247.115	712.635
Con. Pro.	59.625	113.236	0.60296	-173.135	292.385
(C)Phylogenetic Diversity (PD)
(I)group (J)group	Mean Difference (I-J)	Std. Error	Sig.(P-values)	95% Confidence Interval
				Lower Bound	Upper Bound
Con. IM	-8.16712**	1.52322	1e-05	-11.2982	-5.03608
IM Pro.	8.39499**	1.52322	1e-05	5.26395	11.526
Con. Pro.	0.22787	1.52322	0.88223	-2.90316	3.35891
(D) Shannon diversity index
(I)group (J)group	Mean Difference (I-J)	Std. Error	Sig.(P-values)	95% Confidence Interval
				Lower Bound	Upper Bound
Con. IM	0.0125	0.0812	0.87885	-0.15442	0.17942
IM Pro.	0	0.0812	1	-0.16692	0.16692
Con. Pro.	0.0125	0.0812	0.87885	-0.15442	0.17942
P-values are from two-tailed least significant difference (*P < 0.05, **P < 0.01; n = 8).
